# Supplementary material for: Opposite changing dual-emission luminescence of gold nanoparticles by sulfhydryl to develop a pesticide biosensing strategy
Source: Royal Society of Chemistry journal article supplement (doi:10.1039/c9ay00445a), 2019-01-01
Supplement: c9ay00445a1.pdf [file c9ay00445a1.pdf]

## Supporting information

# Opposite changing dual-emissions luminescent of gold nanoparticles by sulfhydryl to develop pesticides biosensing strategy

Yuliang Pan,<sup>a,b</sup> Yong Li,<sup>a,b</sup> Huan Ma,<sup>a</sup> Wang Li<sup>a,\*</sup>

<sup>a</sup> Hunan Key Laboratory of Processed Food for Special Medical Purpose, College of Food Science and Engineering, Central South University of Forestry and Technology, Changsha, 410004, P. R. China

<sup>b</sup> College of Life Science and Technology, Central South University of Forestry and Technology, Changsha, 410004, China

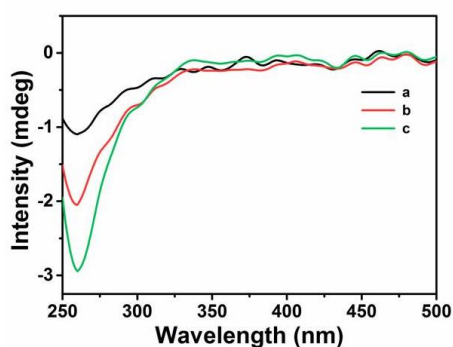

**Figure S1.** CD spectra of the GS-AuNPs without (a) or with (b, c) cysteine. Data for GS-AuNPs was shown for comparison (a). Curve a, b and c represented GS-AuNPs with different concentration of cysteine: GS-AuNPs 12  $\mu\text{L}$  per 100  $\mu\text{L}$  solution, cysteine 1.67 mM (b) and 6.67 mM (c).

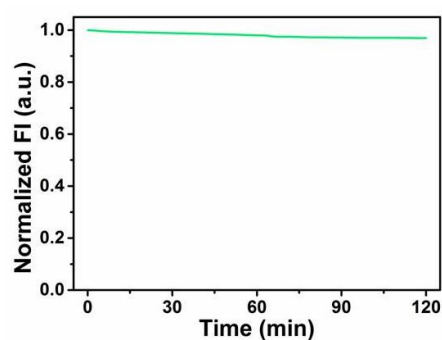

**Figure S2.** Photostability of GS-AuNPs.

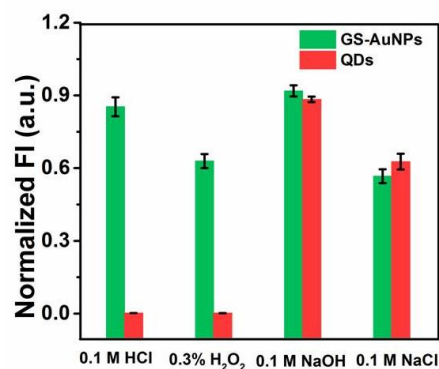

**Figure S3.** Comparison of chemical stability between GS-AuNPs and MPA-coated CdTe QDs in different media. The fluorescence emission from control experiment (see **Figure 1**) was set to 1. GS-AuNPs and CdTe QDs were both added to 0.3 % H<sub>2</sub>O<sub>2</sub>, 0.1 M HCl, 0.1 M NaCl, or 0.1 M NaOH, and were recorded with an excitation wavelength at

400 nm and 474 nm respectively.

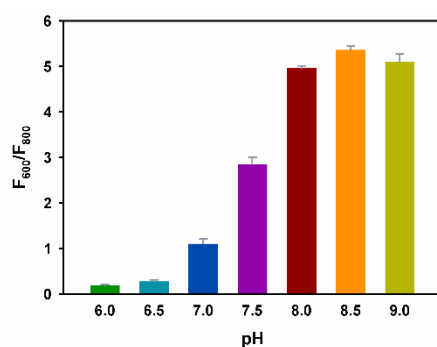

**Figure S4.** The optimization of pH.

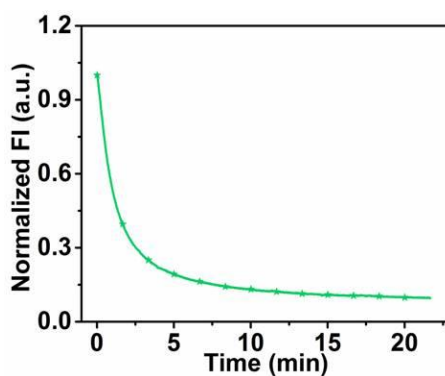

**Figure S5.** The reaction kinetics of AChE, ATCh and GS-AuNPs system at 800 nm emission.

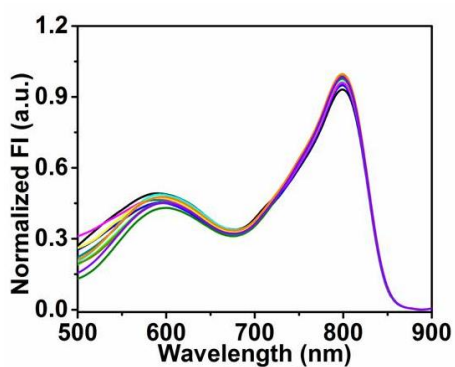

**Figure S6.** The influence of these ten pesticides upon the whole reaction system. (pesticides: 2  $\mu\text{g}/\text{mL}$ , GS-AuNPs: 3  $\mu\text{L}$  per 100  $\mu\text{L}$  solution)
